# Supplementary material
Source: Preprints.org preprint supplement (doi:10.20944/preprints202009.0081.v1)
Supplement: Supplementary file 1 [file supplementary]

## Supplementary material

### Eco-friendly betanin hybrid materials based on palygorskite and halloysite

Shue Li <sup>a,b,c</sup>, Bin Mu <sup>a,c\*</sup>, Xiaowen Wang <sup>a,c</sup>, Yuru Kang <sup>a,c</sup>, Aiqin Wang<sup>a,c\*</sup>

<sup>a</sup> *Key Laboratory of Clay Mineral Applied Research of Gansu Province, Center of Eco-Materials and Green Chemistry, Lanzhou Institute of Chemical Physics, Chinese Academy of Sciences, Lanzhou, P. R. China*

<sup>b</sup> *Center of Materials Science and Optoelectronics Engineering, University of Chinese Academy of Sciences, Beijing, P. R. China*

<sup>c</sup> *Center of Xuyi Palygorskite Applied Technology, Lanzhou Institute of Chemical Physics, Chinese Academy of Sciences, Xuyi, P. R. China*

---

\*Corresponding authors. E-mail addresses: mubin@licp.cas.cn (B. Mu) and aqwang@licp.cas.cn (A. Wang); Fax: +86 931 4968019; Tel: +86 931 4868118.

## I. Supplementary Figures

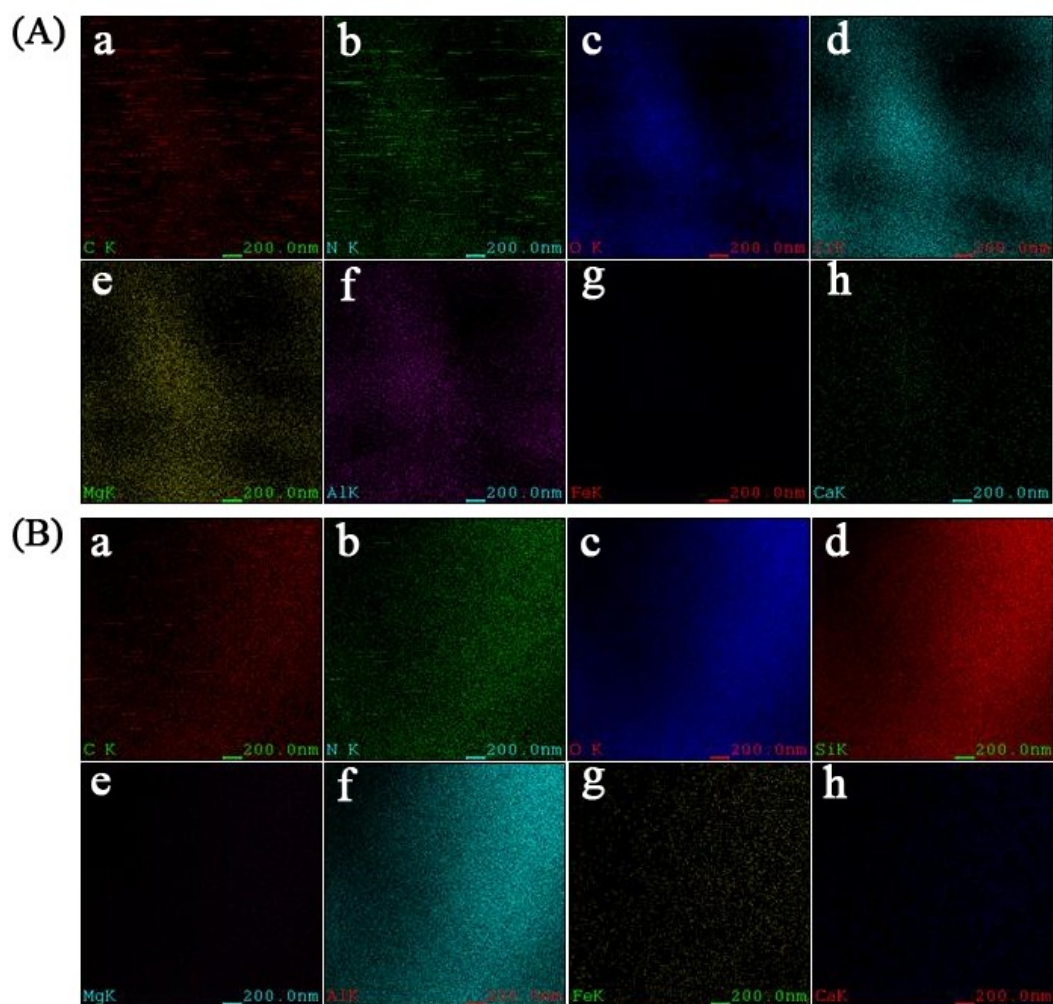

**Figure S1.** The element mapping images of (A) betanin/Pal and (B) betanin/Hal: (a) C, (b) N, (c) O, (d) Si, (e) Mg, (f), Al (g) Fe, (h) Ca.

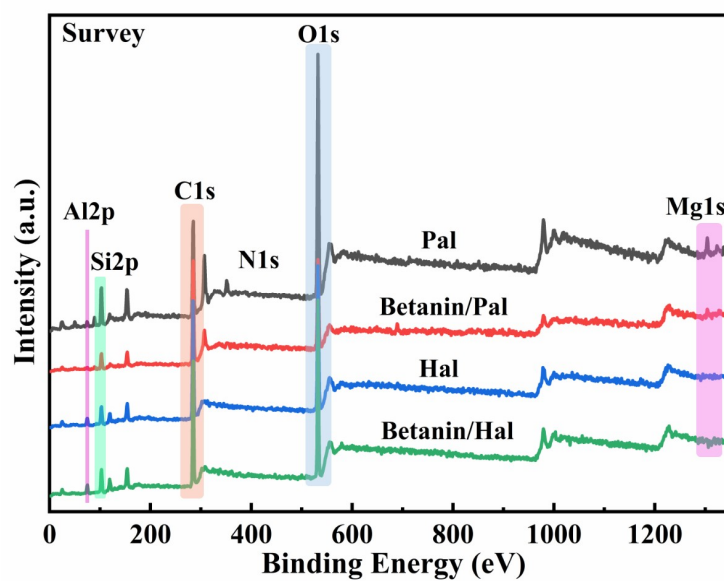

**Figure S2.** X-ray photoelectron spectra of Pal, betanin/Pal, Hal and betanin/Hal.

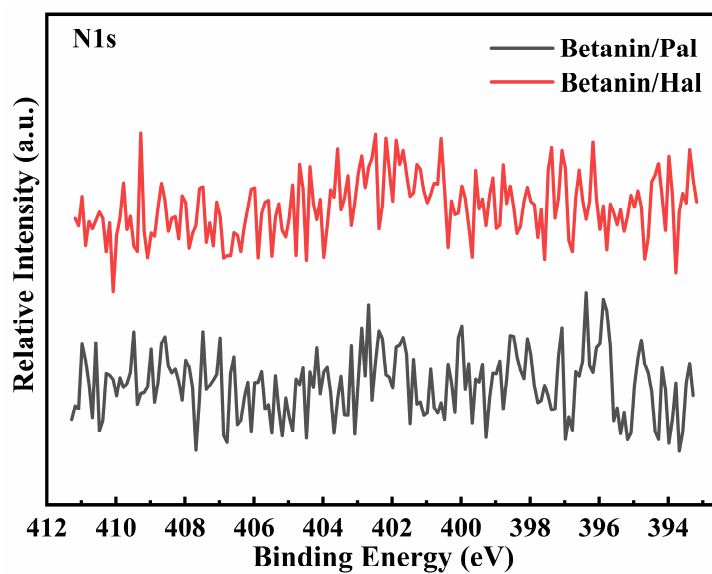

**Figure S3.** XPS high-resolution scanning spectra of betanin/Pal and betanin/Hal: N1s.

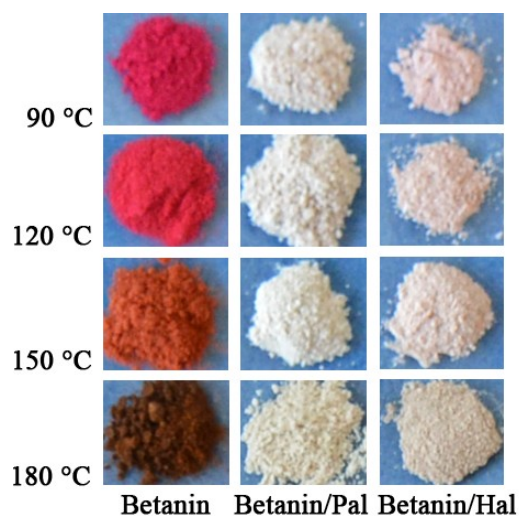

**Figure S4.** Digital images of the pure betanin, betanin/Pal and betanin/Hal at different heating temperatures

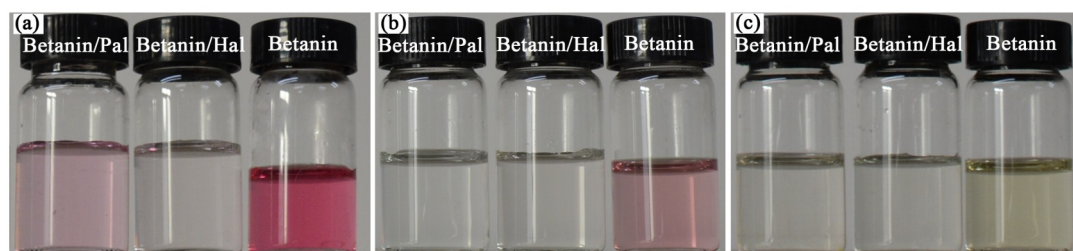

**Figure S5.** Digital images of the pure betanin and betanin desorbed from the betanin/Pal and betanin/Hal hybrid materials after being immersed for 24 h in (a) distilled water, (b) 0.1 M HCl and (c) 0.1 M NaOH, respectively.

## II. Supplementary Tables

**Table S1.** Color parameters of pure betanin, Pal and Hal

| Samples | Color parameters |       |       |
|---------|------------------|-------|-------|
|         | $L^*$            | $a^*$ | $b^*$ |
| Betanin | 64.54            | 15.13 | 5.99  |
| Pal     | 83.08            | 0.41  | 6.27  |
| Hal     | 77.10            | 4.86  | 11.95 |
